# Supplementary material for: High-fidelity DNA ligation enforces accurate Okazaki fragment maturation during DNA replication
Source: PubMed Central journal article supplement (PMC7817679; doi:10.1038/s41467-020-20800-1), 2021-01-20
Supplement: 41467_2020_20800_MOESM3_ESM.pdf [file 41467_2020_20800_MOESM3_ESM.pdf]

## Description of Additional Supplementary Files

File Name: Supplementary Movie 1

Description: A structural morph between the un-bulged and bulged DNA bound states of mutant  $LIG1^{EE/AA}$  DNA complexes is displayed. The bulged extrahelical nucleotide in the insC complex flips into a pocket created by alanine mutations (sticks) in the AdD (turquoise) and DBD (grey) domains.
